# Supplementary material
Source: publisher site journal article supplement (https://www.dovepress.com/article/483225)

**Supplementary Text S1**

**Preliminary search strategy**

**PubMed**

Date searched: May 19, 2023

Results: 132

(("compassion fatigue"[Title/Abstract] OR "vicarious experience*"[Title/Abstract] OR "vicarious trauma"[Title/Abstract] OR "indirect trauma"[Title/Abstract] OR "secondary trauma*"[Title/Abstract]) AND growth[Title/Abstract]) OR Vicarious Posttraumatic Growth[Title/Abstract] OR Vicarious Post-Traumatic Growth[Title/Abstract] OR secondary posttraumatic growth[Title/Abstract]

**Web of Science**

Date searched: May 19, 2023

Results: 307

#1 (TI= "compassion fatigue" OR TI="vicarious experience*" OR TI="vicarious trauma" OR TI="indirect trauma" OR TI="secondary trauma*" OR AB="compassion fatigue" OR AB="vicarious experience*" OR AB="vicarious trauma" OR AB="indirect trauma" OR AB="secondary trauma*") AND (TI=growth OR AB=growth)

#2 TI=Vicarious Posttraumatic Growth OR AB=Vicarious Posttraumatic Growth

#3 TI=Vicarious Post-Traumatic Growth OR AB=Vicarious Post-Traumatic Growth

#4 TI=secondary posttraumatic growth OR AB=secondary posttraumatic growth

**Cochrane**

Date searched: May 19, 2023

Results: 2

(("compassion fatigue" OR "vicarious experience*" OR "vicarious trauma" OR "indirect trauma" OR "secondary trauma*") AND Growth) OR Vicarious Post-Traumatic Growth OR Vicarious Posttraumatic Growth OR secondary posttraumatic growth

((("compassion fatigue"):ti,ab,kw OR ("vicarious experience*"):ti,ab,kw OR ("vicarious trauma"):ti,ab,kw OR ("indirect trauma"):ti,ab,kw OR ("secondary trauma*"):ti,ab,kw) AND (Growth):ti,ab,kw) OR (Vicarious Post-Traumatic Growth):ti,ab,kw OR (Vicarious Posttraumatic Growth):ti,ab,kw OR (secondary posttraumatic growth):ti,ab,kw

**Cochrane Central Register of Controlled Trials**

Date searched: May 19, 2023

Results: 122

(("compassion fatigue" OR "vicarious experience*" OR "vicarious trauma" OR "indirect trauma" OR "secondary trauma*") AND Growth) OR Vicarious Post-Traumatic Growth OR Vicarious Posttraumatic Growth OR secondary posttraumatic growth

**Embase**

Date searched: May 19, 2023

Results: 161

#1 'compassion fatigue'/exp OR 'vicarious trauma'/exp OR 'secondary traumatic stress'/exp

#2 'compassion fatigue':ab,ti OR 'vicarious experience*':ab,ti OR 'vicarious trauma':ab,ti OR 'indirect trauma':ab,ti OR 'secondary trauma*':ab,ti

#3 #2 or #1

#4 'growth'/exp OR growth

#5 #3 AND #4

#6 'vicarious post-traumatic growth' OR (vicarious AND 'post traumatic' AND ('growth'/exp OR growth)) OR 'vicarious posttraumatic growth':ab,ti OR 'secondary posttraumatic growth':ab,ti

#7 #5 OR #6

**CINAHL Plus (PsycINFO)**

Date searched: May 19, 2023

Results: 73

S1 TI ( "compassion fatigue" OR "vicarious experience*" OR "vicarious trauma" OR "indirect trauma" OR "secondary trauma*" ) OR AB ( "compassion fatigue" OR "vicarious experience*" OR "vicarious trauma" OR "indirect trauma" OR "secondary trauma*" )

S2 TI growth OR AB Growth

S3 TI ( Vicarious Post-Traumatic Growth OR Vicarious Posttraumatic Growth OR secondary posttraumatic growth ) OR AB ( Vicarious Post-Traumatic Growth OR Vicarious Posttraumatic Growth OR secondary posttraumatic growth )

S4 S1 AND S2

S5 S4 OR S3

**ProQuest Dissertations & Theses Global**

Date searched: May 19, 2023

Results: 227

title((("compassion fatigue" OR ("vicarious experience") OR "vicarious trauma" OR "indirect trauma" OR ("secondary traumatic")) AND Growth) OR Vicarious Post-Traumatic Growth OR Vicarious Posttraumatic Growth OR secondary posttraumatic growth) OR abstract((("compassion fatigue" OR ("vicarious experience") OR "vicarious trauma" OR "indirect trauma" OR ("secondary traumatic")) AND Growth) OR Vicarious Post-Traumatic Growth OR Vicarious Posttraumatic Growth OR secondary posttraumatic growth)

**Supplementary Text S2**

**Records excluded:**

**Identification of studies via databases and registers:**

**Not really focus on VPTG:**

1. Killian K, Hernandez-Wolfe P, Engstrom D, Gangsei D. Development of the Vicarious Resilience Scale (VRS): A measure of positive effects of working with trauma survivors. Psychological trauma : theory, research, practice and policy. 2017;9(1):23-31.
2. Woodwick I. Tenacious Hope: A Grounded Theory Model of How Vicarious Resilience Develops in Clinicians Who Work with Children Who Have Experienced Trauma. United States Illinois, The Chicago School of Professional Psychology; 2021.
3. Rahman MLR. Impact of Counselor Wellness on Positive and Negative Consequences of COVID-19 Shared Trauma. United States Texas, St. Mary's University (Texas); 2021.
4. Piccolino ST. Vicarious resilience: traversing the path from client to clinician through a search for meaning. Social Work in Health Care. 2022;61(6-8):468-482.
5. Bhagwagar H. Secondary trauma, burnout and resilience among mental health professionals from India: A review of research. Asian Journal of Psychiatry. 2022;76.
6. Elshershaby ST. Therapist Experiences of Working with Trauma: Understanding Self-of-the-Therapist Development. United States California, Alliant International University; 2022.
7. Dhinse SK. 'you cannot pour from an empty container': the impact of working with trauma survivors on mental health professional. England, University of Leicester (United Kingdom); 2017.
8. Branson DC. Vicarious trauma, themes in research, and terminology: A review of literature. Traumatology. 2019;25(1):2-10.
9. Elick EL. Mental Health and Well-Being of Humanitarian Aid Workers: Exploring the Impact of Occupational Health, Team Characteristics, and Job Location. United States Illinois, Wheaton College; 2021.
10. Dekel R, Solomon Z, Horesh D. Predicting secondary posttraumatic stress symptoms among spouses of veterans: Veteran's distress or spouse's perception of that distress? Psychological trauma : theory, research, practice and policy. 2021.
11. Pair JM. A Qualitative Inquiry into the Phenomenon of Vicarious Resilience in Law Enforcement Officers. United States -- Minnesota, Walden University; 2018.
12. Munson JS. Impact of client suicide on practitioner posttraumatic growth. United States -- Florida, University of Florida; 2009.

**The study is a review:**

1. Cohen K, Collens P. The Impact of Trauma Work on Trauma Workers: A Metasynthesis on Vicarious Trauma and Vicarious Posttraumatic Growth. Psychological Trauma-Theory Research Practice and Policy. 2013;5(6):570-580.
2. Manning-Jones S. Vicarious posttraumatic growth: A systematic literature review. 2015.
3. Bybee S. Vicarious Posttraumatic Growth in End-of-Life Care: How Filling Gaps in Knowledge Can Foster Clinicians' Growth. Journal of social work in end-of-life & palliative care. 2018;14(4):257-273.
4. Tsirimokou A, Kloess JA, Dhinse SK. Vicarious Post-traumatic Growth in Professionals Exposed to Traumatogenic Material: A Systematic Literature Review. Trauma, violence & abuse. 2022:15248380221082079.
5. Deaton JD, Ohrt JH, Linich K, McCartney E, Glascoe G. Vicarious Posttraumatic Growth: A Systematic Review and Thematic Synthesis Across Helping Professions. Traumatology. 2023;29(1):17-26.

**Not involving nurses：**

1. Naghavi A, Salimi S. An autoethnography of vicarious trauma and vicarious growth in the context of rehabilitation counseling. Iranian Journal of Psychiatry and Behavioral Sciences. 2018;12(4).
2. Stahlbrodt PN. Behavioral Health Medical Interpreters: Cluster Analysis of Vicarious Traumatization and Posttraumatic Growth. United States-Minnesota, Walden University; 2016.
3. Kang X, Fang Y, Li S, et al. The benefits of indirect exposure to trauma: The relationships among vicarious posttraumatic growth, social support, and resilience in ambulance personnel in China. Psychiatry Investigation. 2018;15(5):452-459.
4. Imtiyaz Ahmad D, Iqbal N. Beyond linear evidence: The curvilinear relationship between secondary traumatic stress and vicarious posttraumatic growth among healthcare professionals. Stress and Health. 2020;36(2):203-212.
5. Smith E. The Capacity for Posttraumatic Growth, Compassion Satisfaction, Burnout, and Secondary Traumatic Stress in Relation to the Personality Factors of Training Clinicians Exposed to Vicarious Trauma. United States -- Illinois, The Chicago School of Professional Psychology; 2016.
6. Day KW, Lawson G, Burge P. Clinicians' Experiences of Shared Trauma After the Shootings at Virginia Tech. Journal of Counseling and Development. 2017;95(3):269-278.
7. Bauwens J. Clinicians' Posttraumatic Growth following Hurricane Katrina: The Influence of Life Events, Professional Quality of Life, and Primary and Secondary Traumatic Stress. United States New York, New York University; 2012.
8. Hahn KJ. Considering the power of context: Racism, sexism, and belonging in the vicarious traumatization of counselors. United States -- Kentucky, University of Kentucky; 2010.
9. Higgins A-G. Counsellors' Experience of Being Changed by Clients: A Narrative Autoethnographic Inquiry. England, The University of Manchester (United Kingdom); 2016.
10. Gibbons S, Murphy D, Joseph S. Countertransference and positive growth in social workers. Journal of Social Work Practice. 2011;25(1):17-30.
11. Shoji K, Bock J, Cieslak R, Zukowska K, Luszczynska A, Benight CC. Cultivating secondary traumatic growth among healthcare workers: the role of social support and self-efficacy. Journal of clinical psychology. 2014;70(9):831-846.
12. McGinnis C. Does Trait Mindfulness Moderate the Development of Vicarious Posttraumatic Growth. United States-California, Palo Alto University; 2021.
13. Lai L, Ren Z, Yan Y, et al. The double-edged-sword effect of empathy: The secondary traumatic stress and vicarious posttraumatic growth of psychological hotline counselors during the outbreak of COVID-19. Acta Psychologica Sinica. 2021;53(9):992-1002.
14. Zerach G, Gordon-Shalev T. A Dyadic Exploration of the Associations Between Posttraumatic Stress Symptoms and Posttraumatic Growth Among Combat Veterans and Their Parents: The Role of Distress Tolerance. Psychological Trauma-Theory Research Practice and Policy. 2022.
15. Stevens MA. The Effect of Clinician Hardiness on Posttraumatic Growth and Trauma based on Vicarious Trauma Exposure. United States-Minnesota, Minnesota State University, Mankato; 2015.
16. Juczynski Z, Oginska-Bulik N, Binnebesel J. Empathy and Cognitive Processing as Factors Determining the Consequences of Secondary Exposure to Trauma Among Roman Catholic Clergymen. Journal of Religion & Health. 2022;61(2):1226-1241.
17. Ortega N. An Examination of the Relationship between Attachment Styles, Vicarious Trauma and Vicarious Posttraumatic Growth in Mental Health Professionals. United States -- Massachusetts, William James College; 2018.
18. Hyatt-Burkhart D. The Experience of Vicarious Posttraumatic Growth in Mental Health Workers. Journal of Loss & Trauma. 2014;19(5):452-461.
19. Smith-Lee Chong PA. The experiences of emdr therapists when working with ptsd. England, University of Wolverhampton (United Kingdom); 2016.
20. Brend DM, Krane J, Saunders S. Exposure to Trauma in Intimate Partner Violence Human Service Work: A Scoping Review. Traumatology. 2020;26(1):127-136.
21. Zerach G. "He ain't heavy, he's my brother": Distress tolerance moderates the association between secondary posttraumatic symptoms and secondary posttraumatic growth among siblings of combat veterans. Psychological trauma : theory, research, practice and policy. 2020;12(7):687-697.
22. Ben-Porat A, Itzhaky H. Implications of Treating Family Violence for the Therapist: Secondary Traumatization, Vicarious Traumatization, and Growth. Journal of Family Violence. 2009;24(7):507-515.
23. Fedele KM. An Investigation of Factors Impacting Vicarious Traumatization and Vicarious Posttraumatic Growth in Crisis Workers: Vicarious Exposure to Trauma, Feminist Beliefs, and Feminist Self-Labeling. United States-Ohio, The University of Akron; 2018.
24. Gil S. Is Secondary Traumatization a Negative Therapeutic Response? Journal of Loss & Trauma. 2015;20(5):410-416.
25. Hyatt-Burkhart D. The lived experience of mental health workers in a residential treatment facility who work with multiply traumatized children and self-identify as experiencing vicarious trauma and compassion satisfaction. United States -- Pennsylvania, Duquesne University; 2011.
26. Bachem R, Mitreuter S, Levin Y, Stein JY, Xiao Z, Solomon Z. Longitudinal Development of Primary and Secondary Posttraumatic Growth in Aging Veterans and Their Wives: Domain-Specific Trajectories. Journal of traumatic stress. 2018;31(5):730-741.
27. Greene T, Lahav Y, Kanat-Maymon Y, Solomon Z. A Longitudinal Study of Secondary Posttraumatic Growth in Wives of Ex-POWs. Psychiatry. 2015;78(2):186-197.
28. Millard EL. A mixed methods approach investigating cognitive changes in vicarious trauma within trainees and qualified therapists. England, The University of Nottingham (United Kingdom); 2017.
29. Foreman TM. A mixed methods evaluation of vicarious traumatization and posttraumatic growth among counselors in training. United States -- North Carolina, The University of North Carolina at Greensboro; 2015.
30. Froman M. A Mixed Methods Study of the Impact of Providing Therapy to Traumatized Clients: Vicarious Trauma, Compassion Fatigue, and Vicarious Posttraumatic Growth in Mental Health Therapists. United States -- Minnesota, University of Minnesota; 2014.
31. Morse-Karzen B. Pathways of Cognitive Integration and Their Effect on Vicarious Posttraumatic Growth. United States -- Illinois, The Chicago School of Professional Psychology; 2016.
32. Bauwens J, Tosone C. Posttraumatic growth following Hurricane Katrina: The influence of clinicians’ trauma histories and primary and secondary traumatic stress. Traumatology. 2014;20(3):209-218.
33. Oginska-Bulik N, Bak G. Predictors of Secondary Posttraumatic Growth Among Police Officers Exposed to Secondary Trauma. Journal of Police and Criminal Psychology. 2023.
34. Deaton JDD, Ohrt JHH. A Preliminary Validation of the Vicarious Posttraumatic Growth Inventory Across Helping Professions and Investigation of Construct Validity. Traumatology. 2023.
35. Howard CJ. Promoting Resiliency: Vicarious Posttraumatic Growth in Trauma Clinicians. United States Ohio, Antioch University; 2010.
36. Oyen M. Psychologists' Positive and Negative Effects of Client Work : Correlates and Predictors of Compassion Fatigue and Personal Growth. England, London Metropolitan University (United Kingdom); 2009.
37. Lorgat N. Psychologists’ Experiences of Vicarious Posttraumatic Growth in South Africa. South Africa, University of Johannesburg (South Africa); 2019.
38. Ball J, Watsford C, Scholz B. Psychosocial impacts of training to provide professional help: Harm and growth. Trauma (United Kingdom). 2022;24(2):115-123.
39. West BO. Quality of Life among South African Informal, Non-familial Caregivers of Childhood Sexual Abuse Survivors. United States -- Illinois, The Chicago School of Professional Psychology; 2016.
40. Smith AM, Hamilton AB, Loeb T, Pemberton J, Wyatt GE. Reactions of Novice Interviewers Conducting Trauma Research With Marginalized Communities: A Qualitative Analysis. Journal of interpersonal violence. 2021;36(21-22):NP12176-NP12197.
41. Melaki E, Stavrou P-D. Re-exploring the Vicarious Posttraumatic Growth and Trauma: A Comparison Study Between Private Therapists and Therapists in Nonprofit Organizations Treating Trauma Survivors. Traumatology. 2023;29(1):27-35.
42. Rizkalla N, Segal SP. Refugee trauma work: Effects on intimate relationships and vicarious posttraumatic growth. Journal of Affective Disorders. 2020;276:839-847.
43. Francis SM. The relationship between clinician personality and clinician trauma responses: Implications for vicarious growth. United States -- Georgia, Mercer University; 2017.
44. Măirean C. The Relationship Between Secondary Traumatic Stress and Personal Posttraumatic Growth: Personality Factors as Moderators. Journal of Adult Development. 2016;23(2):120-128.
45. Kingsriter HBW. The Relationship of Religiosity to Vicarious Posttraumatic Growth in Law Enforcement Officers. United States -- Virginia, Liberty University; 2020.
46. Haddock KL. The Relationships Among Secondary Traumatic Stress, Vicarious Post-Traumatic Growth and Personality Characteristics of Therapists. United States -- New York, Hofstra University; 2020.
47. Finklestein M, Laufer A. Resilience, Growth, and Posttraumatic Symptoms among Social Workers Who Are "Doubly Exposed". Social Work Research. 2021;45(4):231-242.
48. Oginska-Bulik N, Michalska P. The role of empathy and cognitive trauma processing in post-traumatic occupational development of female victims of violence. International Journal of Occupational Medicine and Environmental Health. 2022;35(6):679-692.
49. Moreno-Jimenez JE, Blanco-Donoso LM, Demerouti E, et al. The Role of Healthcare Professionals' Passion in Predicting Secondary Traumatic Stress and Posttraumatic Growth in the Face of COVID-19: A Longitudinal Approach. International Journal of Environmental Research and Public Health. 2021;18(9).
50. Zerach G. Secondary growth among former prisoners of war's adult children: The result of exposure to stress, secondary traumatization, or personality traits? Psychological trauma : theory, research, practice and policy. 2015;7(4):313-323.
51. Samios C, Rodzik A, Abel L. Secondary traumatic stress and adjustment in therapists who work with sexual violence survivors: the moderating role of posttraumatic growth. British Journal of Guidance & Counselling. 2012;40(4):341-356.
52. Steen JA, Bernhardt C. Secondary traumatic stress and posttraumatic growth among foster parents. Journal of Public Child Welfare. 2023;17(2):375-389.
53. Ben-Porat A, Gil L, Brafman D, Zriker A, Levy D. Secondary traumatic stress and posttraumatic growth among volunteers at a therapeutic riding center: The role of personal and environmental factors. Current Psychology. 2023;42(5):3658-3667.
54. Beckmann SA. Secondary Traumatic Stress and Posttraumatic Growth: Risk and Protective Factors among American Red Cross Disaster Responders and Disaster Mental Health Workers. United States -- Minnesota, University of Minnesota; 2015.
55. Kunst MJJ, Saan MC, Bollen LJA, Kuijpers KF. Secondary traumatic stress and secondary posttraumatic growth in a sample of Dutch police family liaison officers. Stress and Health. 2017;33(5):570-577.
56. Weiss-Dagan S, Ben-Porat A, Itzhaky H. Secondary traumatic stress and vicarious post-traumatic growth among social workers who have worked with abused children. Journal of Social Work. 2022;22(1):170-187.
57. Kalaitzaki A, Rovithis M. Secondary traumatic stress and vicarious posttraumatic growth in healthcare workers during the first COVID-19 lockdown in Greece: The role of resilience and coping strategies. Psychiatrike. 2021;32(1):19-25.
58. Dar IA, Iqbal N, Emran A. Secondary Traumatic Stress, Vicarious Posttraumatic Growth, and Rumination Among Healthcare Professionals: Examining Conditional Indirect Effect of Secondary Exposure to Trauma. Traumatology. 2023.
59. Berger R. Studying trauma: Indirect effects on researchers and self - And strategies for addressing them. European Journal of Trauma & Dissociation. 2021;5(1).
60. Haggerty D. Substance Use Helpers: An Exploration into the Relationship between Professional Quality of Life and Posttraumatic Growth. United States-Pennsylvania, Duquesne University; 2019.
61. Reuven Even Zahav R, Refaeli T, Shemesh S, Gottlieb S, Ben-Porat A. Supervision Satisfaction Among Social Work Students in Israel: Supervision Components, Peer Support, and Trauma-Related Factors. Research on Social Work Practice. 2020;30(8):884-894.
62. Long S. Supervisors' Perception of Vicarious Trauma and Growth in Australian Refugee Trauma Counsellors. Australian Social Work. 2020;73(1):105-117.
63. Capielo Rosario C, Abreu RL, Gonzalez KA, Cardenas Bautista E. "That day no one spoke": Florida Puerto Ricans Reaction to Hurricane Maria. Counseling Psychologist. 2020;48(3):377-406.
64. Aafjes-van Doorn K, Bekes V, Luo X, Prout TA, Hoffman L. Therapists' Resilience and Posttraumatic Growth During the COVID-19 Pandemic. Psychological Trauma-Theory Research Practice and Policy. 2022;14:S165-S173.
65. Kang JH, Yang S. A Therapist's Vicarious Posttraumatic Growth and Transformation of Self. Journal of Humanistic Psychology. 2022;62(1):151-164.
66. Dyarman JL. Therapists’ Perceptions of the Relationship between Their Trauma-Related Clinical Work and Their Religious and/or Spiritual Functioning. United States-Illinois, Adler University; 2019.
67. Simms J. Transformative practice. Counselling Psychology Review. 2017;32(2):46-56.
68. Cleary E. Understanding Vicarious Trauma and Vicarious Posttraumatic Growth. Northern Ireland, Queen's University Belfast (United Kingdom); 2021.
69. Brockhouse R, Msetfi RM, Cohen K, Joseph S. Vicarious exposure to trauma and growth in therapists: the moderating effects of sense of coherence, organizational support, and empathy. J Trauma Stress. 2011;24(6):735-742.
70. Ben-Porat A, Gottlieb S, Refaeli T, Shemesh S, Zahav RRE. Vicarious growth among social work students: What makes the difference? Health & Social Care in the Community. 2020;28(2):662-669.
71. McCormack L, Hagger MS, Joseph S. Vicarious Growth in Wives of Vietnam Veterans: A Phenomenological Investigation Into Decades of "Lived" Experience. Journal of Humanistic Psychology. 2011;51(3):273-290.
72. Moran L. Vicarious occupational posttraumatic growth. United States -- Illinois, Northern Illinois University; 2012.
73. Deaton JD. Vicarious Post Traumatic Growth Among Helping Professionals: Factor Analysis and an Investigation of Construct Validity. United States -- South Carolina, University of South Carolina; 2020.
74. Splevins KA, Cohen K, Joseph S, Murray C, Bowley J. Vicarious posttraumatic growth among interpreters. Qualitative health research. 2010;20(12):1705-1716.
75. Wooloff CJ. Vicarious posttraumatic growth and attachment style in mental health professionals. United States -- New Jersey, Montclair State University; 2014.
76. Downey M. Vicarious posttraumatic growth in clinicians. United States -- California, Palo Alto University; 2013.
77. Arnold D, Calhoun LG, Tedeschi R, Cann A. Vicarious posttraumatic growth in psychotherapy. Journal of Humanistic Psychology. 2005;45(2):239-263.
78. Mills D. Vicarious post-traumatic growth: a psychological sequelae of working in oncological services. Wales, Cardiff University (United Kingdom); 2018.
79. Ben-Porat A. Vicarious Post-Traumatic Growth: Domestic Violence Therapists Versus Social Service Department Therapists in Israel. Journal of Family Violence. 2015;30(7):923-933.
80. Abel L, Walker C, Samios C, Morozow L. Vicarious posttraumatic growth: Predictors of growth and relationships with adjustment. Traumatology: An International Journal. 2014;20(1):9-18.
81. Barre K, De Boer S, Guarnaccia C. Vicarious trauma and posttraumatic growth among victim support professionals. Current Psychology. 2023.
82. Cosden M, Sanford A, Koch LM, Lepore CE. Vicarious trauma and vicarious posttraumatic growth among substance abuse treatment providers. Substance abuse. 2016;37(4):619-624.
83. McNeillie N, Rose J. Vicarious trauma in therapists: a meta-ethnographic review. Behavioural and Cognitive Psychotherapy. 2021;49(4):426-440.
84. Sui X-C, Padmanabhanunni A. Vicarious trauma: The psychological impact of working with survivors of trauma for South African psychologists. Journal of Psychology in Africa. 2016;26(2):127-133.
85. Tabor PD. Vicarious traumatization: Concept analysis. Journal of Forensic Nursing. 2011;7(4):203-208.
86. Yılmaz T. Victimology from clinical psychology perspective: psychological assessment of victims and professionals working with victims. Current psychology (New Brunswick, NJ). 2021;40(4):1592-1600.
87. Bluvstein I, Kfir I, Lifshitz R, Markovitz N, Shmotkin D. Vulnerability and Resilience in Sensitive Research: The Case of the Quantitative Researcher. Journal of Empirical Research on Human Research Ethics. 2021;16(4):396-402.
88. Sutton TG. What We Learn from Each Other: Vicarious Posttraumatic Growth Among Non-Helping Professionals Following Exposure to Peer Trauma Experiences. United States -- Virginia, Old Dominion University; 2022.
89. Coleman AM, Chouliara Z, Currie K. Working in the Field of Complex Psychological Trauma: A Framework for Personal and Professional Growth, Training, and Supervision. Journal of interpersonal violence. 2021;36(5-6):2791-2815.
90. Linehan KS. Working with trauma survivors: An existential perspective on how therapists come to terms with their own changing experiences of the world, the self, and others. United States-Pennsylvania, Chestnut Hill College; 2014.
91. Ryckman K. Working with Trauma Survivors: Vicarious Posttraumatic Growth Scale Development Positive Effects Measure. United States -- California, Alliant International University; 2020.
92. Strange CN. "You can stay if you want" – Women's experiences providing rape crisis medical advocacy. United States -- Kentucky, University of Kentucky; 2014.
93. Davey KL. Secondary traumatisation and post-traumatic growth: how are employees of charities who provide practical support to asylum seekers affected by their work?. England, University of Leicester (United Kingdom); 2011.
94. Barrington A, Shakespeare-Finch J. Working with refugee survivors of torture and trauma: An opportunity for vicarious post-traumatic growth. Counselling Psychology Quarterly. 2013;26(1):89-105.
95. McCormack LM. Primary and vicarious posttraumatic growth following genocide, war and humanitarian emergencies: an interpretative phenomenological analysis. England, The University of Nottingham (United Kingdom); 2010.
96. Michalchuk S, Martin SL. Vicarious resilience and growth in psychologists who work with trauma survivors: An interpretive phenomenological analysis. Professional Psychology: Research and Practice. 2019;50(3):145-154.
97. De Luce J. A study of health care professionals witnessing painful experiences: Moving beyond indirect trauma to help yourself while helping others. International Journal of Circumpolar Health. 2010;69:448-451.

**Identification of studies via other methods**

**Not involving nurses**

1. Goldblatt H , Buchbinder E , Eisikovits Z ,et al.Between the professional and the private: the meaning of working with intimate partner violence in social workers' private lives. Violence Against Women, 2009, 15(3):362-84..
2. Shamia NA, Thabet AA, Vostanis P. Exposure to war traumatic experiences, post-traumatic stress disorder and post-traumatic growth among nurses in Gaza. J Psychiatr Ment Health Nurs. 2015;22(10):749-755.
3. Johal SS, Mounsey ZR. Finding positives after disaster: Insights from nurses following the 2010-2011 Canterbury, NZ earthquake sequence. Australas Emerg Nurs J. 2015;18(4):174-181.
4. Hunter SV, Schofield MJ. How Counsellors Cope with Traumatized Clients: Personal, Professional and Organizational Strategies. International Journal for the Advancement of Counselling. 2006;28(2):121-138.
5. Iliffe,Gillian.Exploring the Counselor's Experience of Working With Perpetrators and Survivors of Domestic Violence.Journal of Interpersonal Violence, 2000.
6. Clemans SE. Life Changing: The Experience of Rape-Crisis Work. Affilia. 2016;19(2):146-159.
7. Taubman-Ben-Ari O, Weintroub A. Meaning in life and personal growth among pediatric physicians and nurses. Death Studies. 2008;32(7):621-645.
8. Neill LKO ' .Northern Helping Practitioners and the Phenomenon of Secondary Trauma.Canadian Journal of Counselling, 2010, 44(2).DOI:637..
9. Benatar M. A Qualitative Study of the Effect of a History of Childhood Sexual Abuse on Therapists Who Treat Survivors of Sexual Abuse. Journal of Trauma & Dissociation. 2000;1(3):9-28.
10. Holly Bell. Strengths and secondary trauma in family violence work. National Association of Social Workers.2003.
11. Vishnevsky, T., Quinlan, M. M., Kilmer, R. P., Cann, A., & Danhauer, S. C. (2015). “The Keepers of Stories”: Personal growth and wisdomamong oncology nurses. Journal of Holistic Nursing, 33(4), 326–344.
12. Kinsey DP, Leslie L.F, James M.H, Robert F.S, and Richard B. Mille EK. Working with Sexually Abused Children. The American Journal of Family Therapy. 36:1-15, 2008.

**The study is a review**

1. Cleary E, Curran D, Kelly G, Dorahy MJ, Hanna D. The Meta-Analytic Relationship Between Secondary Traumatic Stress and Vicarious Posttraumatic Growth in Adults. Traumatology. 2023;29(1):36-45.

**Supplementary Text S3**

**Figure Distribution of the included articles in geographical map**


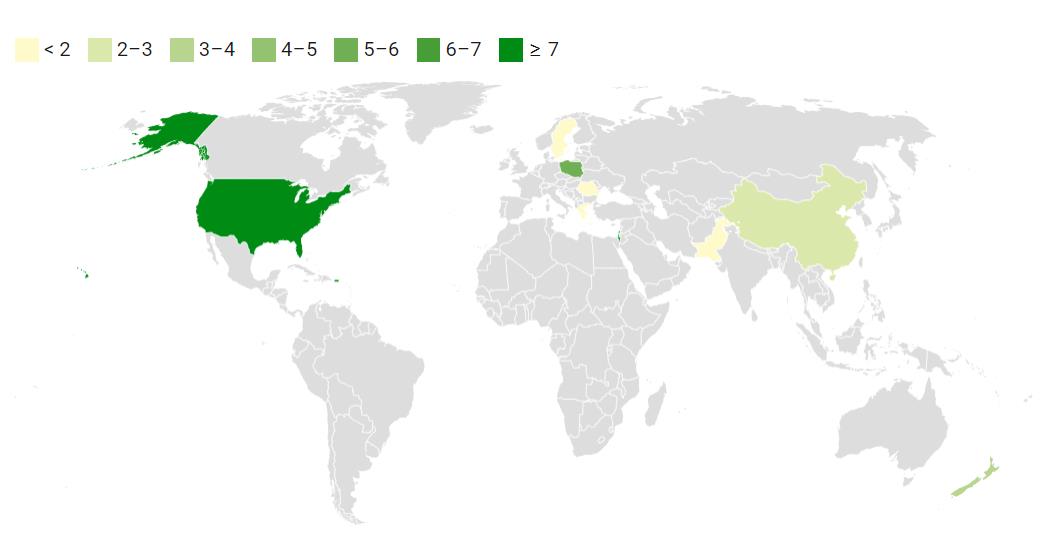

Supplement: Supplementary file 1 [file get_supplementary_file.php]
